# Supplementary material for: A Systematic Review and Meta-Analysis on the Role of Nutraceuticals in the Management of Neuropathic Pain in In Vivo Studies
Source: MDPI journal article supplement (doi:10.3390/antiox11122361), 2022-11-28
Supplement: s1 [file s1]

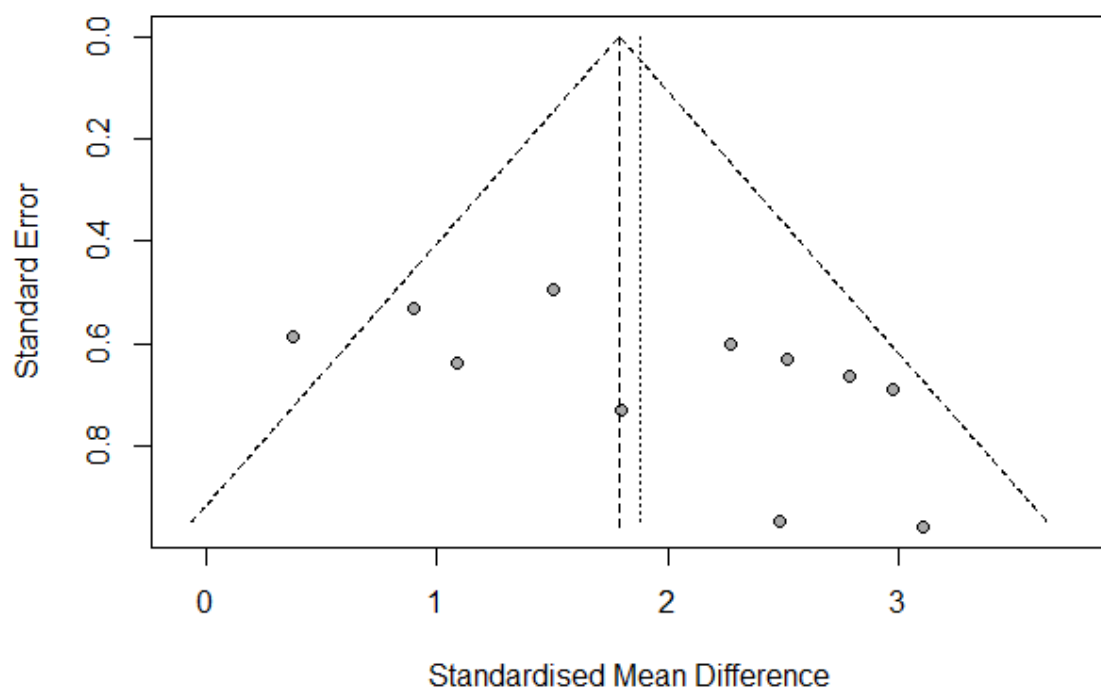

**Supplementary Figure S1.** Funnel plot for meta-analysis on the effects of natural drugs in neuropathic pain.

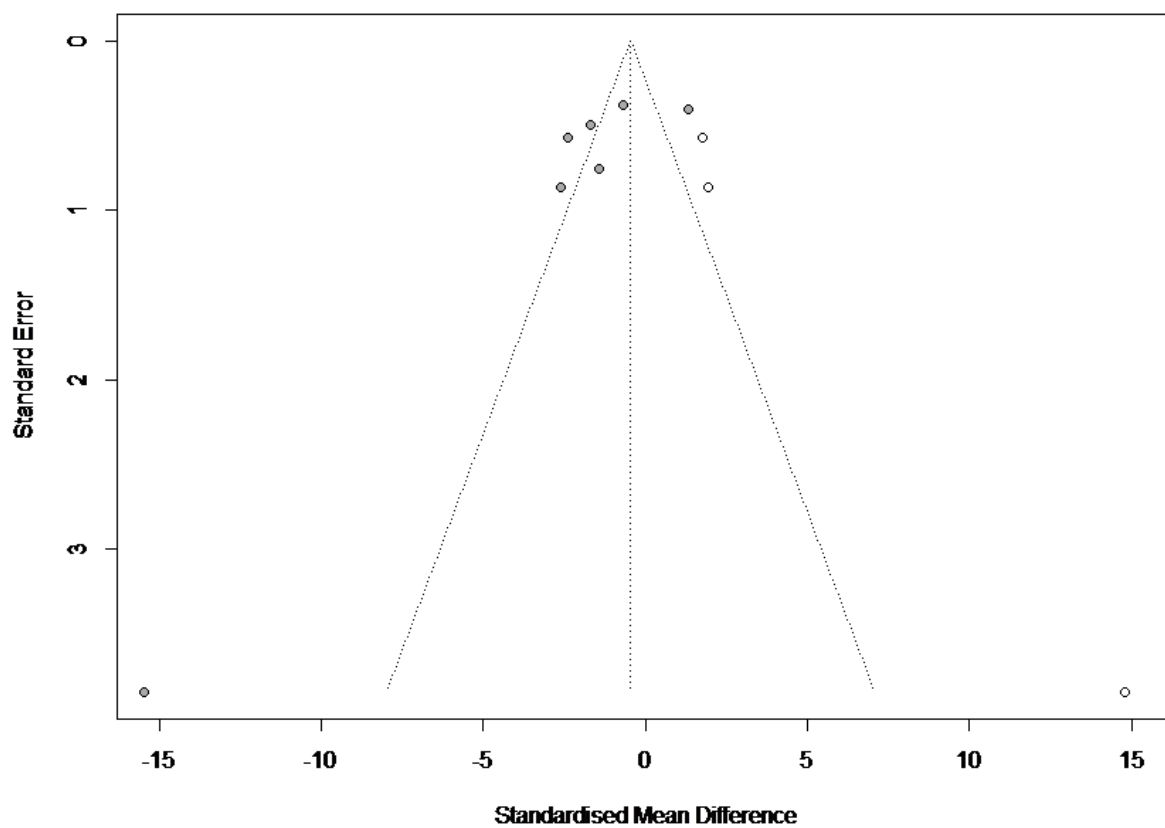

**Supplementary Figure S2.** Funnel plot for meta-analysis on the effects of natural drugs in neuropathic pain after applying the trim-and fill method. The filled -in-study results are printed as open circles.

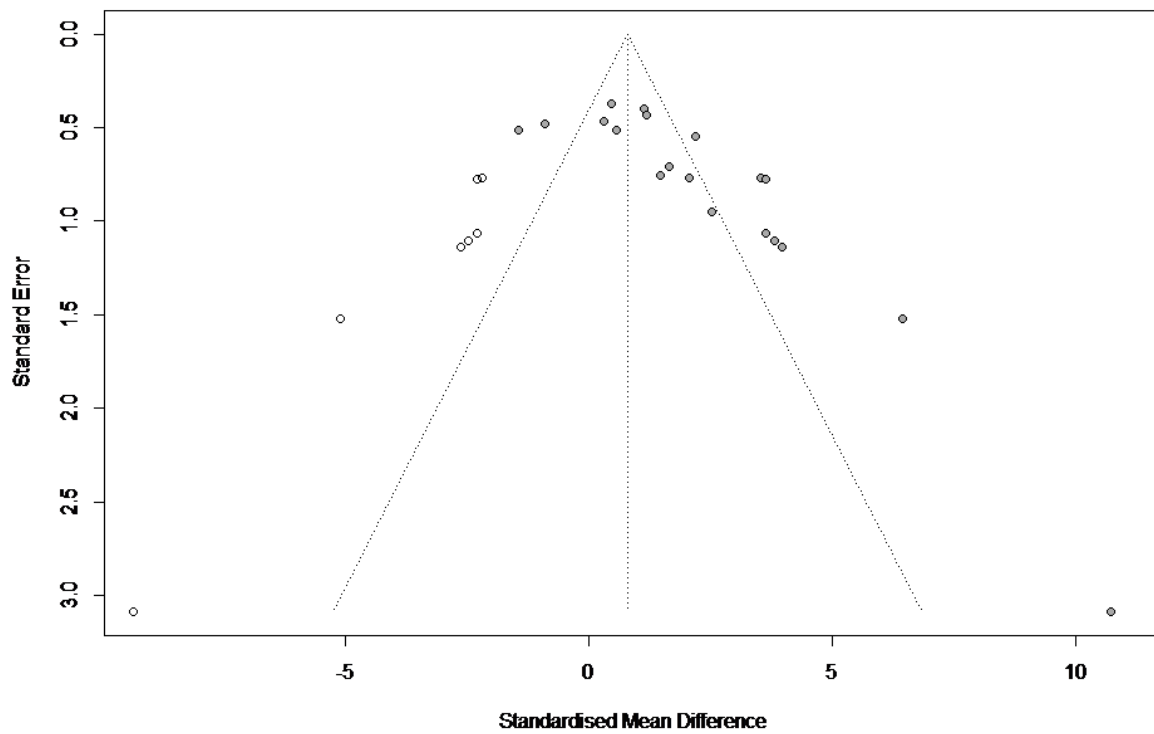

**Supplementary Figure S3.** Funnel plot for meta-analysis on the effects of natural in neuropathic pain after applying the trim-and fill method. The filled -in-study results are printed as open circles.
